# Supplementary material for: Decontamination from water pollutants and pathogens by electrospun nanofibers doped with heavy-atom-free borafluorene-BODIPY photosensitizers
Source: publisher site journal article supplement (doi:10.3762/bjnano.17.46), 2026-05-20
Supplement: Additional file 1 [file 2190-4286-17-46-S1.pdf]

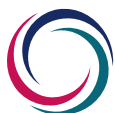

## Supporting Information

for

### **Decontamination from water pollutants and pathogens by electrospun nanofibers doped with heavy-atom-free borafluorene-BODIPY photosensitizers**

Angelika Zaszczyńska, Paulina H. Marek-Urban, Karolina Wrochna, Agnieszka E. Kuklewska, Kacper Kręgielewski, Marta Grodzik, Dawid R. Natkowski, Jolanta Mierzejewska, Ewa Iwanek, Agata Blacha-Grzechnik, Paweł Sajkiewicz and Krzysztof Durka

*Beilstein J. Nanotechnol.* **2026**, *17*, 668–682. [doi:10.3762/bjnano.17.46](https://doi.org/10.3762/bjnano.17.46)

## Additional experimental data

# 1 NMR

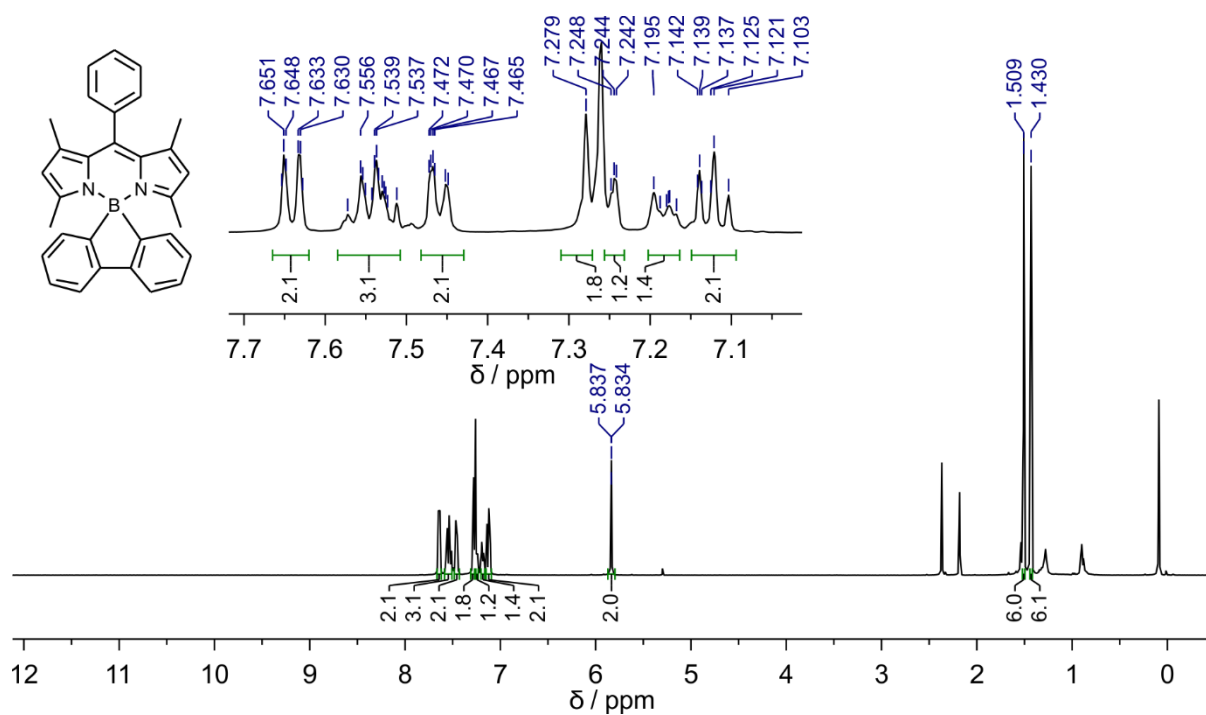

**Figure S1:**  $^1\text{H}$  NMR (400 MHz) spectrum of **1** in  $\text{CDCl}_3$ .

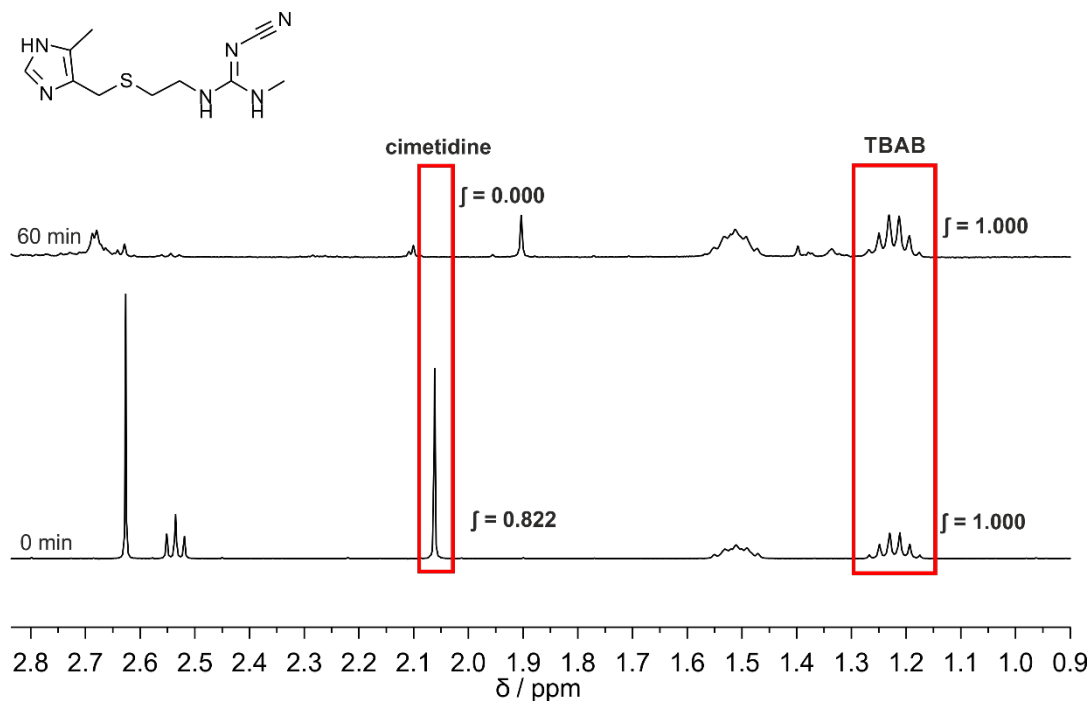

**Figure S2:** Analysis of the  $^1\text{H}$  NMR spectrum (400 MHz,  $\text{CDCl}_3$ ) for the photocatalytic oxidation of cimetidine with **1** (0.15 wt %) $@\text{PCL}$  ( $\text{H}_2\text{O}$ , 26 W white LED, 25  $^\circ\text{C}$ ). Integrals used for determination of reaction conversion are marked.

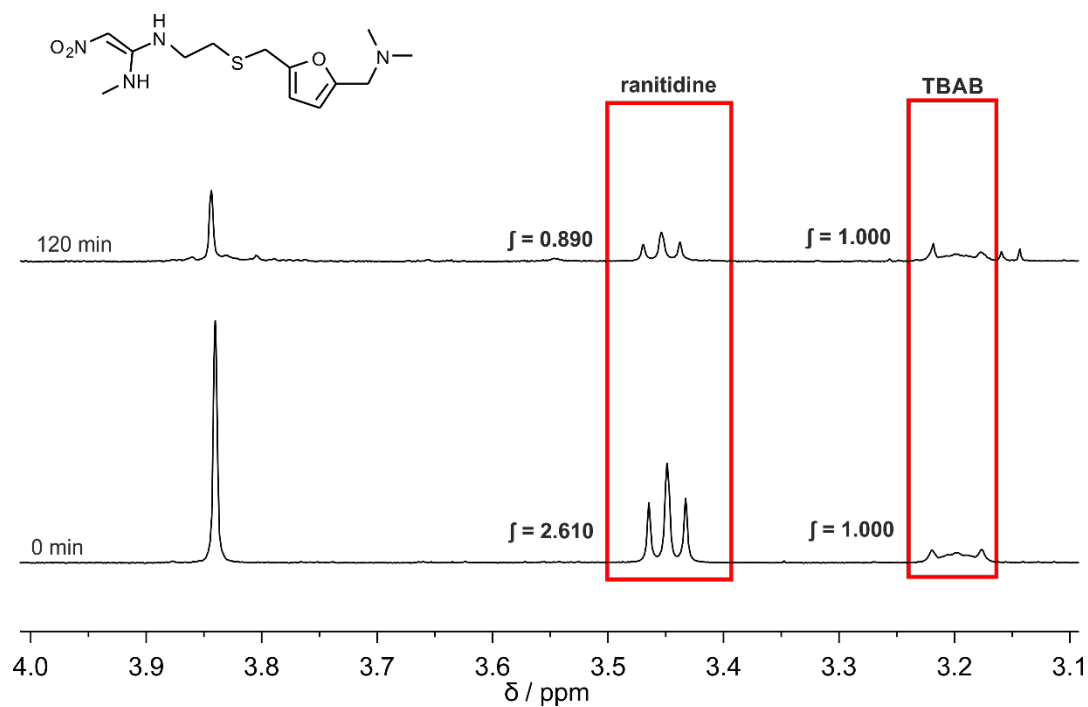

**Figure S3:** Analysis of the <sup>1</sup>H NMR spectrum (400 MHz, CDCl<sub>3</sub>) for the photocatalytic oxidation of ranitidine with **1** (0.15 wt %)<sub>@</sub>PCL (H<sub>2</sub>O, 26 W white LED, 25 °C). Integrals used for determination of reaction conversion are marked.

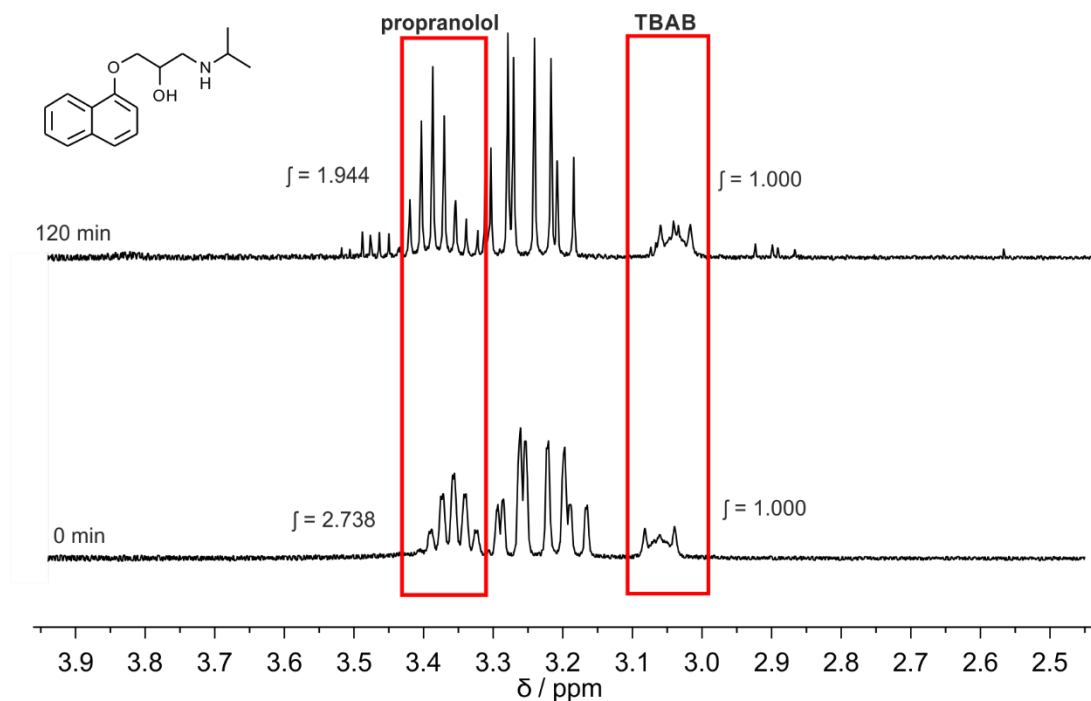

**Figure S4:** Analysis of the <sup>1</sup>H NMR spectrum (400 MHz, CDCl<sub>3</sub>) for the photocatalytic oxidation of propranolol with **1** (0.15 wt %)<sub>@</sub>PCL (H<sub>2</sub>O, 26 W white LED, 25 °C). Integrals used for determination of reaction conversion are marked.

## 2 Photocatalytic studies

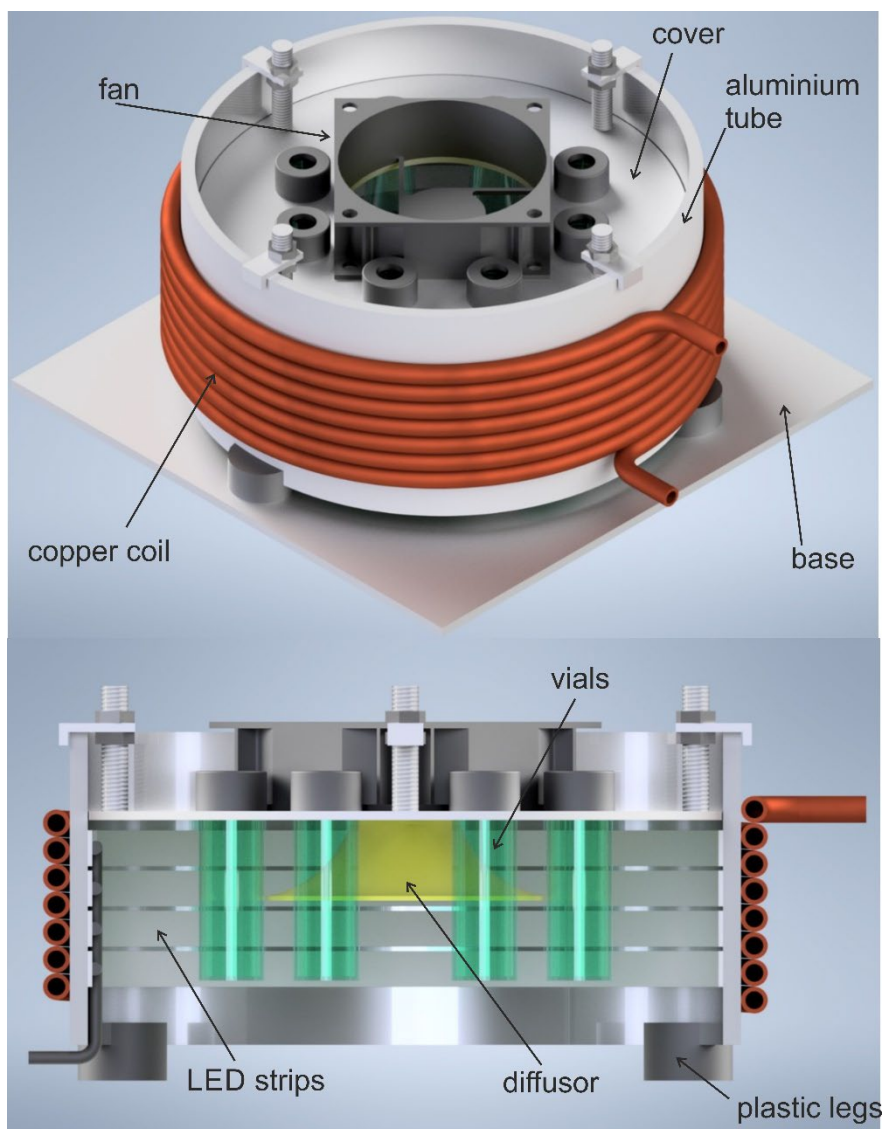

**Figure S5:** Model of photoreactor used in the photocatalytic degradation of pharmaceuticals. Figure S5 was adapted from [1], (© 2021 P. H. Marek-Urban et al., Published by American Chemical Society, distributed under the terms of the Creative Commons Attribution 4.0 International License, <https://creativecommons.org/licenses/by/4.0>).

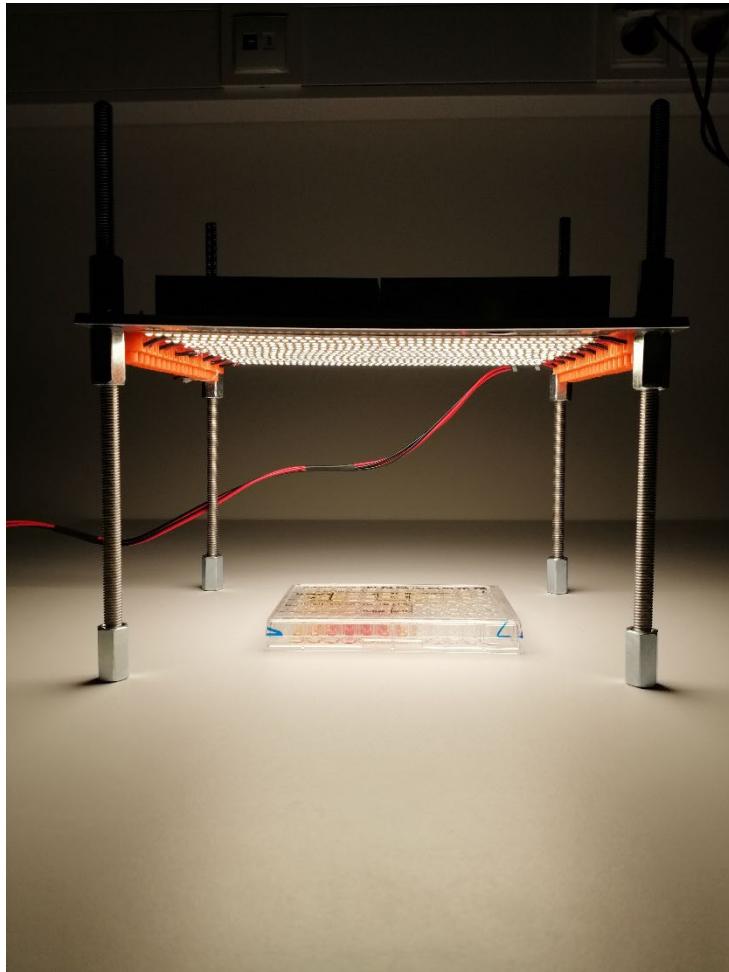

**Figure S6:** Photoreactor used in the microbiological experiments.

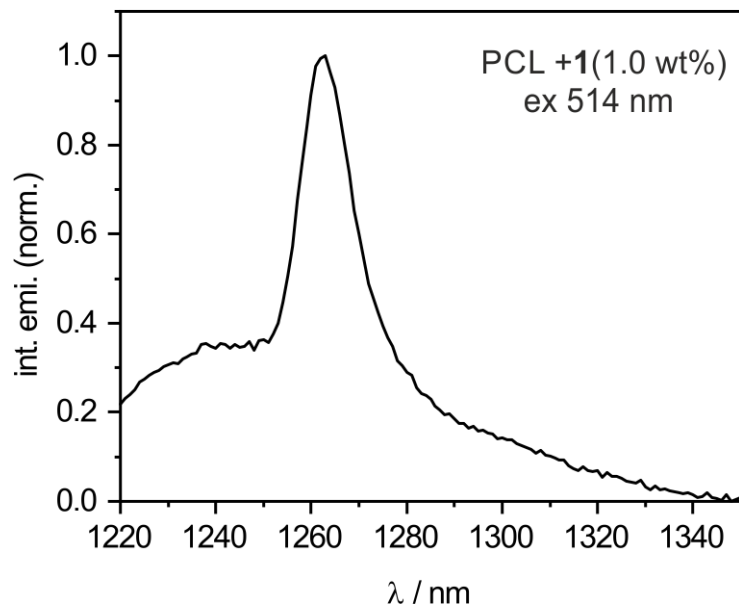

**Figure S7:** Emission spectrum of singlet oxygen for PCL@1(1.00 wt %) excited at  $\lambda_{\text{ex}} = 520$  nm.

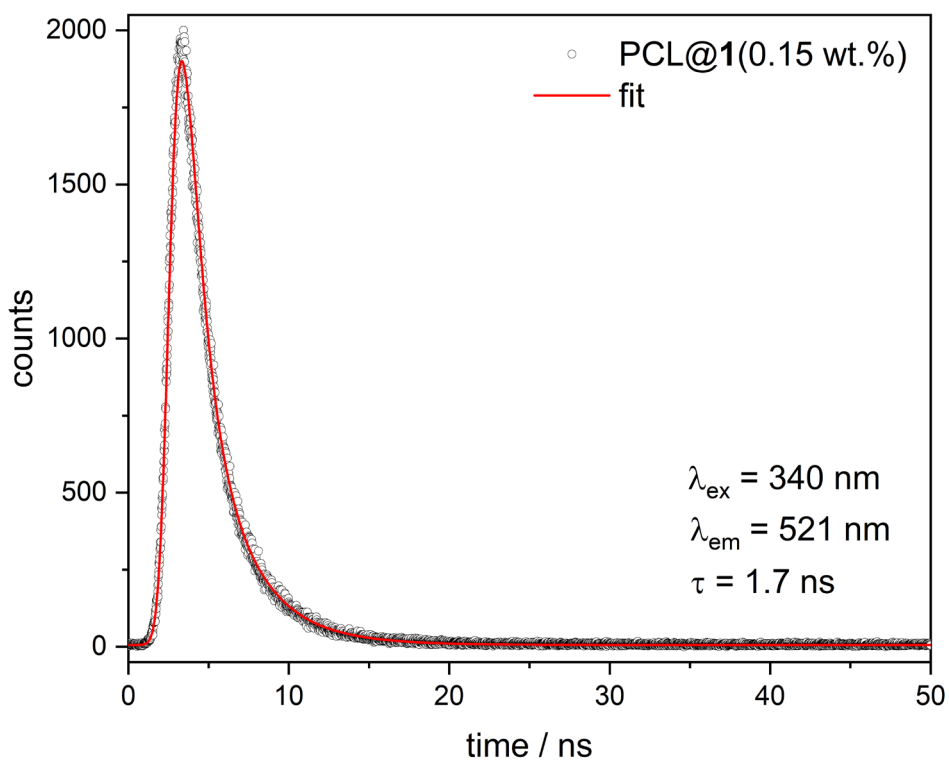

**Figure S8:** Fluorescence decay of PCL@1(0.15 wt %) at  $\lambda_{\text{em}} = 521$  nm.

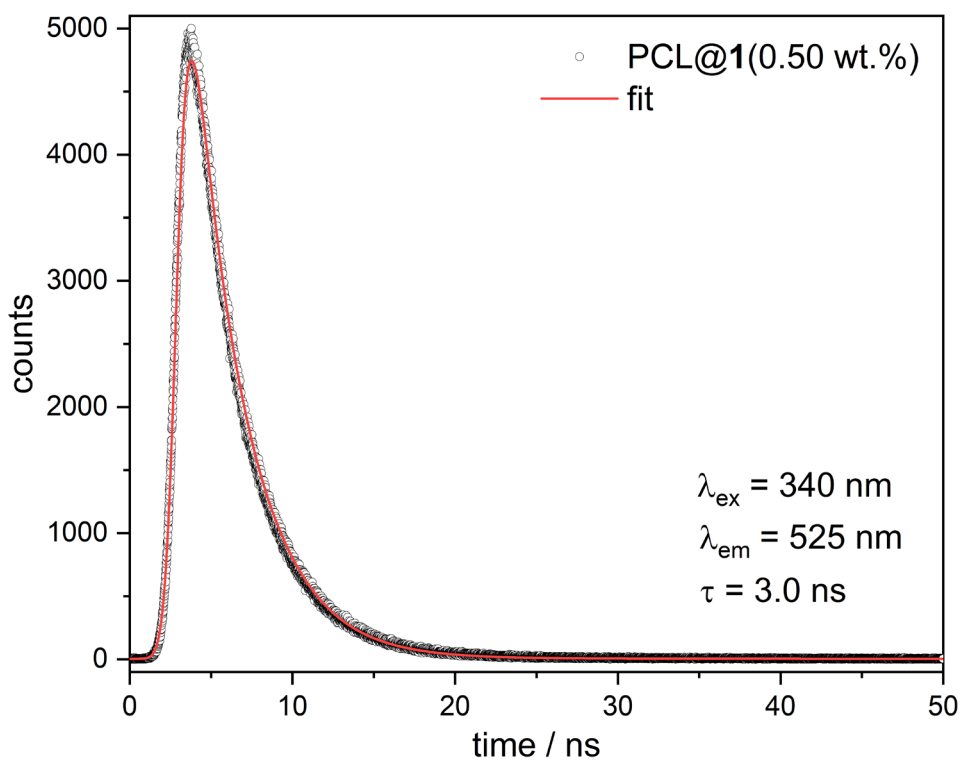

**Figure S9:** Fluorescence decay of PCL@1(0.50 wt %) at  $\lambda_{\text{em}} = 525 \text{ nm}$ .

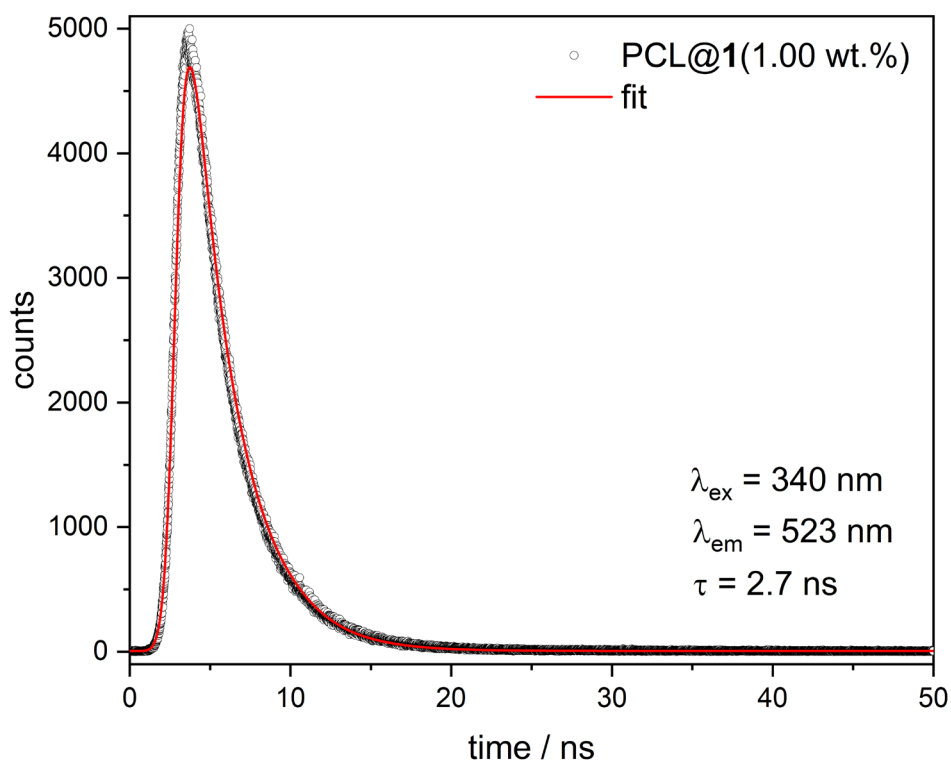

**Figure S10:** Fluorescence decay of PCL@1(1.00 wt %) at  $\lambda_{\text{em}} = 523 \text{ nm}$ .

## References

1. Marek-Urban, P.H.; Urban, M.; Wiklińska, M.; Paplińska, K.; Woźniak, K.; Blacha-Grzechnik, A.; Durka, K. *J. Org. Chem.* **2021**, *86*, 12714–12722. doi:10.1021/acs.joc.1c01254
